# Supplementary material for: Association between motor competence and Functional Movement Screen scores
Source: PeerJ. 2019 Aug 8;7:e7270. doi: 10.7717/peerj.7270 (PMC6689389; doi:10.7717/peerj.7270)
Supplement: Supplemental Information 1 [file peerj-07-7270-s001.xlsx]

## Sheet: base_2.1
COD	Age	SEX	FMS_Squat	FMS_HS_Dir	FMS_HS_Esq	FMS_HS_TOTAL	FMS_ILL_Dir	FMS_ILL_Esq	FMS_ILL_TOTAL	FMS_SM_Dir	FMS_SM_Esq	FMS_SM_TOTAL	FMS_SLR_Dir	FMS_SLR_Esq	FMS_SLR_TOTAL	FMS_T_PushUp	FMS_RS_Dir	FMS_RS_Esq	FMS_RS_TOTAL	FMS_TOTAL	MC_JUMP_1	MC_JUMP_2	MAX_MC_JUMP	MC_THROWING_1	MC_THROWING_2	MAX_MC_THROWING	MC_KICKING_1	MC_KICKING_2	MAX_MC_KICKING	MC_SHUTLLE_RUN_1	MC_SHUTLLE_RUN_2	MAX_MC_SHUTLLE_RUN	MC_LATERAL_JUMP_RUN_1	MC_LATERAL_JUMP_RUN_2	MAX_MC_LATERAL_JUMP_RUN	MC_SHIFTING_PLATFORMS_1	MC_SHIFTING_PLATFORMS_2	MAX_MC_SHIFTING_PLATFORMS	ZMAX_MC_JUMP	ZMAX_MC_THROWING	ZMAX_MC_KICKING	ZMAX_MC_SHUTLLE_RUN	ZMAX_MC_LATERAL_JUMP	ZMAX_MC_SHIFTING_PLATFORMS	T_score_MC_JUMP	T_score_MC_THROWING	T_score_MC_KICKING	T_score_MC_SHUTLLE_RUN	inverse_Tscore_MC_SHUTLLE_RUN
Phd_01	19	1	2	2	2	2	3	3	3	2	1	1	3	3	3	0	2	2	2	13	167	156	167	11.3	11.3	11.3	16.1	15.9	16.1	11.63	11.8	11.63	30	19	30	25	27	27	-0.313295	-0.825528	-0.297961	-0.359468	-0.261458	-1.03975	46.867	41.7447	47.0204	46.4053	53.5947
Phd_02	19	1	2	2	2	2	2	2	2	3	3	3	3	3	3	2	2	2	2	16	160	159	160	6.6	9.3	9.3	13.5	12	13.5	11.97	11.23	11.23	42	46	46	27	30	30	-0.554532	-0.853118	-1.19028	-0.524395	0.772071	0.519875	44.4547	41.4688	38.0972	44.756	55.244
Phd_03	19	1	2	1	1	1	2	3	2	1	1	1	2	2	2	0	2	2	2	10	185	196	196	20.1	19.3	20.1	21	22.4	22.4	10.76	13	10.76	6	47	47	22	28	28	0.686116	-0.704134	1.86421	-0.718185	0.836666	-0.519875	56.8612	42.9587	68.6421	42.8181	57.1819
Phd_04	45	2	3	1	1	1	2	2	2	3	3	3	2	3	2	3	2	2	2	16	203	208	208	22.5	22.1	22.5	23.3	25.9	25.9	9.75	10.04	9.75	52	54	54	32	40	40	-0.535074	-0.942843	0.513469	-0.887112	1.11863	1.28397	44.6493	40.5716	55.1347	41.1289	58.8711
Phd_05	20	1	3	2	2	2	3	3	3	3	1	1	3	3	3	1	2	2	2	15	204	196	204	13.6	13	13.6	14.6	20.5	20.5	11.01	10.7	10.7	49	48	49	28	31	31	0.961816	-0.7938	1.21212	-0.742925	0.965857	1.03975	59.6182	42.062	62.1212	42.5708	57.4292
Phd_06	19	1	2	2	1	1	2	2	2	3	3	3	3	3	3	1	2	2	2	14	170	161	170	12.4	12.9	12.9	21	14.8	21	11.41	11.41	11.41	44	47	47	25	30	30	-0.209908	-0.803457	1.38373	-0.450178	0.836666	0.519875	47.9009	41.9654	63.8373	45.4982	54.5018
Phd_07	19	1	2	2	2	2	2	2	2	3	3	3	2	2	2	1	2	2	2	14	190	196	196	16.4	16.7	16.7	18.8	18.6	18.8	10.93	10.12	10.12	42	47	47	26	28	28	0.686116	-0.751036	0.628682	-0.98207	0.836666	-0.519875	56.8612	42.4896	56.2868	40.1793	59.8207
Phd_10	20	1	2	1	1	1	2	2	2	3	3	3	2	2	2	1	2	2	2	13	139	135	139	10.4	12.4	12.4	12.6	13.8	13.8	13	12.9	12.9	37	43	43	19	27	27	-1.27824	-0.810354	-1.08732	0.164178	0.578284	-1.03975	37.2176	41.8965	39.1268	51.6418	48.3582
Phd_12	19	2	1	2	2	2	2	2	2	1	3	1	3	3	3	3	2	2	2	14	272	246	272	23	23.4	23.4	24.9	26.2	26.2	9.99	10.05	9.99	54	55	55	29	39	39	2.22353	-0.933762	0.610688	-0.852604	1.1886	1.14551	72.2353	40.6624	56.1069	41.474	58.526
Phd_13	18	2	2	2	2	2	3	3	3	3	3	3	3	3	3	3	2	2	2	17	148	246	246	17.3	19.2	19.2	28.4	27.5	28.4	9.03	8.93	8.93	52	58	58	33	34	34	1.10285	-0.976141	1.32362	-1.00501	1.39851	0.453199	61.0285	40.2386	63.2362	39.9499	60.0501
Phd_14	19	2	2	2	2	2	3	3	3	2	1	1	2	2	2	2	2	2	2	14	999	999	999	999	999	999	999	999	999	999	999	999	999	999	999	999	999	999	999	999	999	999	999	999	999	999	999	999	999
Phd_15	19	1	3	2	2	2	3	3	3	3	3	3	2	3	2	2	2	2	2	18	197	179	197	16.9	15.6	16.9	16.5	16.5	16.5	10.43	10.93	10.43	45	51	51	30	27	30	0.720579	-0.748277	-0.160681	-0.854251	1.09505	0.519875	57.2058	42.5172	48.3932	41.4575	58.5425
Phd_16	19	2	2	2	2	2	3	2	2	1	2	1	1	1	1	1	2	2	2	11	236	240	240	21	20.9	21	21.8	23	23	9.79	9.55	9.55	44	43	44	29	33	33	0.844228	-0.957979	-0.426308	-0.915869	0.418929	0.314736	58.4423	40.4202	45.7369	40.8413	59.1587
Phd_17	19	2	2	3	3	3	2	2	2	3	3	3	3	3	3	1	2	2	2	16	223	216	223	21.6	24.7	24.7	26.4	25.8	26.4	9.39	9.37	9.37	44	49	49	26	34	34	0.111474	-0.920644	0.6755	-0.94175	0.768779	0.453199	51.1147	40.7936	56.755	40.5825	59.4175
Phd_18	21	2	2	1	1	1	2	2	2	3	3	3	2	2	2	3	2	2	2	15	230	228	230	24.2	23.7	24.2	25.5	27.2	27.2	10.01	9.71	9.71	47	50	50	28	28	28	0.413196	-0.925689	0.934749	-0.892864	0.838749	-0.377577	54.132	40.7431	59.3475	41.0714	58.9286
Phd_19	27	1	2	2	2	2	2	2	2	3	3	3	3	3	3	2	2	2	2	16	202	201	202	14.4	11.4	14.4	17.4	17.4	17.4	10.37	9.97	9.97	43	47	47	28	29	29	0.892891	-0.782764	0.148201	-1.04392	0.836666	0	58.9289	42.1724	51.482	39.5608	60.4392
Phd_20	19	2	3	3	2	2	2	2	2	2	3	2	2	2	2	3	2	1	1	15	225	221	225	17.2	18.5	18.5	25.9	25	25.9	10.15	9.55	9.55	48	55	55	32	33	33	0.19768	-0.983205	0.513469	-0.915869	1.1886	0.314736	51.9768	40.168	55.1347	40.8413	59.1587
Phd_21	19	2	2	2	2	2	2	2	2	3	3	3	3	3	3	3	2	2	2	14	241	247	247	19.4	19.8	19.8	23.7	24.5	24.5	9.68	9.47	9.47	42	47	47	26	31	31	1.14595	-0.970087	0.0597837	-0.927371	0.628839	0.037811	61.4595	40.2991	50.5978	40.7263	59.2737
Phd_23	20	1	3	2	2	2	3	3	3	2	1	1	3	3	3	1	2	2	2	15	176	172	176	14.4	15.1	15.1	18.5	16.4	18.5	12.95	11.5	11.5	42	47	47	24	29	29	-0.00313295	-0.773108	0.525722	-0.413069	0.836666	0	49.9687	42.2689	55.2572	45.8693	54.1307
Phd_26	999	1	2	3	2	2	2	2	2	2	2	2	3	3	3	1	2	2	2	14	168	253	253	15.4	15.5	15.5	19.9	16.5	19.9	10.58	10.76	10.58	45	46	46	28	32	32	2.65048	-0.76759	1.0062	-0.792403	0.772071	1.55963	76.5048	42.3241	60.062	42.076	57.924
Phd_27	22	1	999	999	999	999	999	999	999	999	999	999	999	999	999	999	999	999	999	999	999	999	999	22.2	21.3	22.2	999	999	999	999	999	999	999	999	999	999	999	999	999	-0.675165	999	999	999	999	999	43.2483	999	999	999
Phd_29	18	2	2	2	2	2	3	2	2	2	1	1	2	2	2	2	2	2	2	13	225	234	234	24.4	25.9	25.9	25.8	25.7	25.8	12	9.64	9.64	43	41	43	29	31	31	0.585609	-0.908536	0.481063	-0.902928	0.348959	0.037811	55.8561	40.9146	54.8106	40.9707	59.0293
Phd_30	19	2	2	2	2	2	2	2	2	3	3	3	2	2	2	3	2	2	2	16	223	227	227	18.3	19.8	19.8	26.9	26.9	26.9	10.06	9.99	9.99	47	51	51	29	999	999	0.283886	-0.970087	0.837531	-0.852604	0.908719	#NULL!	52.8389	40.2991	58.3753	41.474	58.526
Phd_31	18	2	2	2	2	2	2	2	2	3	3	3	3	3	3	1	2	2	2	15	209	213	213	20.1	19.9	20.1	26.4	26.7	26.7	9.62	9.7	9.62	40	47	47	29	33	33	-0.319558	-0.96706	0.772718	-0.905804	0.628839	0.314736	46.8044	40.3294	57.7272	40.942	59.058
Phd_32	18	2	2	1	1	1	2	2	2	2	1	1	2	2	2	3	2	2	2	13	215	216	216	23.1	22.3	23.1	27.9	28.7	28.7	9.75	9.5	9.5	47	51	51	26	31	31	-0.190248	-0.936789	1.42084	-0.923058	0.908719	0.037811	48.0975	40.6321	64.2084	40.7694	59.2306
Phd_33	19	2	2	2	2	2	2	2	2	1	1	1	2	2	2	3	2	2	2	14	202	206	206	23.5	21.4	23.5	27.5	28.8	28.8	9.74	0	0	40	45	45	26	26	26	-0.62128	-0.932753	1.45325	-2.28899	0.488899	-0.654502	43.7872	40.6725	64.5325	27.1101	72.8899
Phd_34	19	2	1	2	2	2	2	3	3	3	3	3	3	3	3	1	2	2	2	15	260	259	260	17.2	17.5	17.5	24.6	22.8	24.6	10.1	9.8	9.8	57	64	64	31	31	31	1.70629	-0.993295	0.0921898	-0.879923	1.81833	0.037811	67.0629	40.067	50.9219	41.2008	58.7992
Phd_36	20	2	2	2	2	2	2	2	2	2	1	1	3	3	3	3	2	2	2	17	191	190	191	20.7	21.6	21.6	24.6	24.5	24.6	10.75	10.26	10.26	44	50	50	27	31	31	-1.26783	-0.951924	0.0921898	-0.813783	0.838749	0.037811	37.3217	40.4808	50.9219	41.8622	58.1378
Phd_41	20	2	2	2	1	1	1	1	1	3	3	3	2	2	2	2	2	2	2	12	220	219	220	23.9	25.9	25.9	27.8	26.7	27.8	9.47	999	9.47	45	52	52	29	39	39	-0.0178358	-0.908536	1.12919	-0.927371	0.978689	1.14551	49.8216	40.9146	61.2919	40.7263	59.2737
Phd_42	999	2	2	1	1	1	2	2	2	1	2	1	1	3	1	2	2	2	2	11	214	226	226	23.9	23.5	23.9	26	27.3	27.3	10.11	999	10.11	39	36	39	25	0	25	0.240783	-0.928716	0.967155	-0.835351	0.0690795	-0.792965	52.4078	40.7128	59.6716	41.6465	58.3535
Phd_43	23	1	3	1	2	1	3	2	2	3	3	3	3	3	3	1	2	2	2	15	210	212	212	20	18.7	20	22.6	22.9	22.9	10.85	10.4	10.4	43	45	45	28	31	31	1.23752	-0.705514	2.03581	-0.86662	0.707475	1.03975	62.3752	42.9449	70.3581	41.3338	58.6662
Phd_45	25	2	1	3	2	2	2	2	2	1	1	1	2	2	2	1	2	2	2	11	206	201	206	22.3	23.5	23.5	27.4	25.2	27.4	10.23	9.75	9.75	45	47	47	22	0	22	-0.62128	-0.932753	0.999561	-0.887112	0.628839	-1.20835	43.7872	40.6725	59.9956	41.1289	58.8711
Phd_46	21	2	1	2	2	2	1	2	1	1	1	1	2	2	2	3	2	2	2	12	214	208	214	23.9	23.6	23.9	28	27.5	28	9.14	999	9.14	47	48	48	34	33	34	-0.276455	-0.928716	1.194	-0.974819	0.698809	0.453199	47.2355	40.7128	61.94	40.2518	59.7482
Phd_47	20	2	2	2	2	2	2	2	2	3	1	1	3	2	2	3	2	2	2	14	206	206	206	21.2	22.2	22.2	26.3	27	27	10.11	999	10.11	45	45	45	30	31	31	-0.62128	-0.94587	0.869937	-0.835351	0.488899	0.037811	43.7872	40.5413	58.6994	41.6465	58.3535
Phd_49	49	2	2	1	1	1	2	1	1	1	1	1	3	3	3	1	2	2	2	11	192	190	192	196	23.1	196	25	23.5	25	23.1	23.7	23.1	23.3	10.4	23.3	10.2	30	30	-1.22472	0.807841	0.221814	1.03238	-1.02945	-0.100652	37.7528	58.0784	52.2181	60.3238	39.6762
Phd_50	20	2	2	2	2	2	2	2	2	2	1	1	3	3	3	3	2	2	2	15	999	999	999	999	999	999	999	999	999	999	999	999	999	999	999	999	999	999	999	999	999	999	999	999	999	999	999	999	999
Phd_51	20	1	2	3	3	3	2	2	2	3	3	3	3	3	3	1	2	2	2	16	138	147	147	138	14.8	138	14.2	14.4	14.4	13.7	11.4	11.4	11.1	12.1	12.1	11.6	25	25	-1.00254	0.922272	-0.881403	-0.454301	-1.41772	-2.0795	39.9746	59.2227	41.186	45.457	54.543
Phd_52	19	1	2	1	1	1	3	3	3	2	1	1	3	3	3	1	2	2	2	13	178	176	178	186	16.3	186	14.4	15	15	13.7	16.3	13.7	15.8	11.6	15.8	11	27	27	0.065792	1.58442	-0.675483	0.494034	-1.17871	-1.03975	50.6579	65.8442	43.2452	54.9403	45.0597
Phd_59	20	2	2	2	2	2	1	1	1	2	1	1	2	2	2	2	2	2	2	12	170	163	170	169	21.3	169	20.6	21.9	21.9	18.6	20.7	18.6	21.6	999	999	999	27	999	-2.17299	0.5354	-0.782776	0.385361	#NULL!	#NULL!	28.2701	55.354	42.1722	53.8536	46.1464
Phd_60	20	1	2	2	2	2	2	2	2	1	1	1	3	3	3	1	2	2	2	13	140	154	154	156	12.9	156	14.6	12.7	14.6	14.9	14.6	14.6	14.9	11.7	14.9	11.6	30	30	-0.761307	1.17058	-0.812763	0.865121	-1.23685	0.519875	42.3869	61.7058	41.8724	58.6512	41.3488
Phd_61	52	2	2	1	1	1	2	2	2	2	1	1	1	1	1	2	2	1	1	10	199	191	199	203	15.8	203	18.8	17.7	18.8	22.2	22.5	22.2	22.7	10.3	22.7	10.8	23	23	-0.923002	0.878473	-1.78737	0.902977	-1.07143	-1.06989	40.77	58.7847	32.1263	59.0298	40.9702
Phd_62	20	2	2	2	2	2	2	2	2	3	1	1	2	2	2	3	1	2	1	13	187	185	187	195	18.3	195	19.6	17.9	19.6	21.2	21.8	21.2	22	10.8	22	10.5	34	34	-1.44024	0.79775	-1.52812	0.759195	-1.12041	0.453199	35.5976	57.9775	34.7188	57.5919	42.4081
Phd_63	19	2	3	3	3	3	3	3	3	2	1	1	3	3	3	3	2	2	2	18	204	208	208	214	19.4	214	21.4	21.7	21.7	23.1	23	23	23.8	999	999	999	42	999	-0.535074	0.989468	-0.847588	1.018	#NULL!	#NULL!	44.6493	59.8947	41.5241	60.18	39.82
Phd_64	19	2	2	2	2	2	2	2	2	3	2	2	3	3	3	3	2	2	2	17	218	210	218	218	17.5	218	17.1	17.8	17.8	23.3	22.7	22.7	23.3	999	999	999	29	999	-0.104042	1.02983	-2.11143	0.974868	#NULL!	#NULL!	48.9596	60.2983	28.8857	59.7487	40.2513
Phd_65	22	2	2	2	1	1	2	2	2	3	3	3	3	2	2	3	2	2	2	15	241	241	241	249	23.8	249	24.4	26.6	26.6	26.4	27.3	26.4	27.2	9.7	27.2	9.4	34	34	0.887331	1.34263	0.740312	1.50686	-0.756567	0.453199	58.8733	63.4263	57.4031	65.0686	34.9314
Phd_66	21	2	2	1	1	1	3	2	2	1	2	1	3	3	3	1	2	2	2	12	220	228	228	227	20.5	227	19.6	19.3	19.6	20.7	24.3	20.7	24	10	24	10	0	10	0.32699	1.12064	-1.52812	0.687304	-0.98047	-2.8699	53.2699	61.2064	34.7188	56.873	43.127
Phd_67	999	2	3	1	1	1	2	3	2	3	3	3	3	3	3	3	2	2	2	17	185	175	185	187	15.5	187	17.9	19.4	19.4	20.7	21.1	20.7	20.6	11.2	20.6	9.9	30	30	-1.52645	0.717027	-1.59293	0.687304	-1.21837	-0.100652	34.7355	57.1703	34.0707	56.873	43.127
Phd_68	24	2	2	2	1	1	3	2	2	2	1	1	3	3	3	1	2	2	2	12	999	999	999	999	20.8	999	21.8	999	999	21.8	22.4	21.8	999	999	999	999	999	999	999	999	999	999	999	999	999	999	999	999	999
Phd_69	22	2	3	2	2	2	3	3	3	2	2	2	3	3	3	3	2	2	2	18	267	287	287	276	21.1	276	21.8	21	21.8	21.7	18.3	18.3	21.1	10.2	21.1	9.4	38	38	2.87008	1.61507	-0.815182	0.342226	-1.18338	1.00705	78.7008	66.1507	41.8482	53.4223	46.5777
Phd_70	21	2	2	3	3	3	2	2	2	1	1	1	3	3	3	3	2	2	2	16	216	215	216	223	21.2	223	21.2	21.6	21.6	22.7	23.2	22.7	22.2	9.6	22.2	9.9	33	33	-0.190248	1.08028	-0.879994	0.974868	-1.10642	0.314736	48.0975	60.8028	41.2001	59.7487	40.2513
Phd_71	18	1	1	2	2	2	2	2	2	2	2	2	2	2	2	1	2	2	2	12	171	173	173	165	15.3	165	11.4	14.2	14.2	13.3	13.2	13.2	15.2	11.1	15.2	11.8	28	28	-0.10652	1.29473	-0.950044	0.287874	-1.21747	-0.519875	48.9348	62.9473	40.4996	52.8787	47.1213
Phd_73	20	2	3	2	2	2	2	2	2	3	3	3	2	2	2	1	2	2	2	15	223	230	230	235	24.7	235	23.1	21.6	23.1	24.3	24	24	24.4	10	24.4	9.4	34	34	0.413196	1.20137	-0.393902	1.16179	-0.952482	0.453199	54.132	62.0137	46.061	61.6179	38.3821
Phd_75	23	2	3	1	1	1	2	2	2	2	1	1	3	3	3	3	2	2	2	15	999	999	999	999	999	999	999	999	999	999	999	999	999	999	999	999	999	999	999	999	999	999	999	999	999	999	999	999	999
Phd_77	20	2	2	1	1	1	2	2	2	1	1	1	3	3	3	3	2	2	2	14	236	243	243	233	23.1	233	23.7	23.1	23.7	21.8	21.9	21.8	23.5	10	23.5	9.4	0	9.4	0.973537	1.18119	-0.199465	0.845464	-1.01546	-2.95298	59.7354	61.8119	48.0053	58.4546	41.5454
Phd_78	23	2	2	1	1	1	2	3	2	3	3	3	3	3	3	3	2	2	2	17	217	227	227	235	22.2	235	23.7	22.6	23.7	24.6	25.5	24.6	26.2	9.7	26.2	9.6	34	34	0.283886	1.20137	-0.199465	1.24805	-0.826536	0.453199	52.8389	62.0137	48.0053	62.4805	37.5195
Phd_80	19	1	1	1	2	1	1	1	1	1	2	1	2	2	2	0	2	2	2	8	120	130	130	131	15.4	131	14.8	14.5	14.8	18	18.4	18	17.9	999	999	999	24	999	-1.58841	0.825708	-0.744123	2.26701	999	999	34.1159	58.2571	42.5588	72.6701	27.3299
Phd_82	21	1	3	2	2	2	3	2	2	3	3	3	3	3	3	1	2	2	2	16	165	159	165	159	15.8	159	14.4	14.9	14.9	17.1	16.2	16.2	18.2	11.3	18.2	11.5	32	32	-0.38222	1.21196	-0.709803	1.52483	-1.02369	1.55963	46.1778	62.1196	42.902	65.2483	34.7517
Phd_83	20	2	2	2	1	1	1	2	1	3	3	3	3	3	3	3	2	2	2	17	204	200	204	205	24.2	205	23.7	24.6	24.6	24.5	25.1	24.5	24.7	9.6	24.7	9.6	33	33	-0.707487	0.898654	0.0921898	1.23368	-0.931491	0.314736	42.9251	58.9865	50.9219	62.3368	37.6632
Phd_84	19	2	1	1	1	1	2	2	2	2	3	2	3	3	3	3	2	2	2	14	228	231	231	228	23.4	228	25	25.9	25.9	23.7	23.9	23.7	24.8	10.2	24.8	10	34	34	0.456299	1.13073	0.513469	1.11865	-0.924494	0.453199	54.563	61.3073	55.1347	61.1865	38.8135
Phd_86	19	2	2	2	2	2	2	2	2	3	3	3	1	1	1	3	2	2	2	15	224	226	226	232	15.8	232	14.4	14.9	14.9	17.1	16.2	16.2	18.2	9.6	18.2	9.9	34	34	0.240783	1.17109	-3.0512	0.0402834	-1.3863	0.453199	52.4078	61.7109	19.488	50.4028	49.5972
Phd_87	22	2	2	1	2	1	2	2	2	3	2	2	3	3	3	3	2	2	2	15	211	209	211	204	22	204	22.2	21.4	22.2	24.6	23.8	23.8	22.3	10.2	22.3	10	36	36	-0.405764	0.888564	-0.685557	1.13303	-1.09942	0.730124	45.9424	58.8856	43.1444	61.3303	38.6697
Phd_88	19	2	2	1	1	1	2	2	2	3	3	3	3	3	3	1	2	2	2	15	999	999	999	999	999	999	999	999	999	999	999	999	999	999	999	999	999	999	999	999	999	999	999	999	999	999	999	999	999
Phd_90	21	2	1	2	2	2	3	2	2	1	1	1	1	1	1	1	2	2	2	9	168	177	177	173	21	173	22.6	22.6	22.6	22.6	21.9	21.9	21.6	10.9	21.6	10.8	30	30	-1.87127	0.575761	-0.555933	0.859842	-1.1484	-0.100652	31.2873	55.7576	44.4407	58.5984	41.4016
Phd_91	20	1	0	2	2	2	3	3	3	3	3	3	3	3	3	3	2	2	2	17	999	999	999	999	999	999	999	999	999	999	999	999	999	999	999	999	999	999	999	999	999	999	999	999	999	999	999	999	999
Phd_92	999	1	0	2	2	2	2	2	2	3	2	2	3	3	3	1	2	2	2	12	181	180	181	182	16.3	182	17.5	14.4	17.5	16.3	14.6	14.6	20.1	11	20.1	10.5	31	31	0.169179	1.52924	0.182521	0.865121	-0.900954	1.03975	51.6918	65.2924	51.8252	58.6512	41.3488
[truncated: 18 more columns]
